# Supplementary material for: R-Substituent induced structural diversity, synergistic effect and highly selective luminescence sensing for Fe3+ detection by post-synthetically modified Cd-MOFs
Source: Royal Society of Chemistry journal article supplement (doi:10.1039/d0ce00476f), 2020-01-01
Supplement: d0ce00476f1.pdf [file d0ce00476f1.pdf]

## Electronic Supplementary Information

R-substituents Induced Structural diversity, Synergistic Effect and Highly selective Luminescence Sensing for Fe<sup>3+</sup> Detection By Postsynthetically modified Cd-MOF

Qing Liu<sup>a</sup>, Jing-Yi Tan<sup>a</sup>, Jian-Yong Zhang<sup>a,\*</sup>, Na Zhang<sup>a,\*</sup> and Wei Deng<sup>a,\*</sup>

<sup>a</sup>School of Chemical and Environmental Engineering, Shanghai Institute of Technology, Shanghai 201418 (China).

E-mail: jianyong1106@163.com, nzhang@sit.edu.cn, wdeng@sit.edu.cn

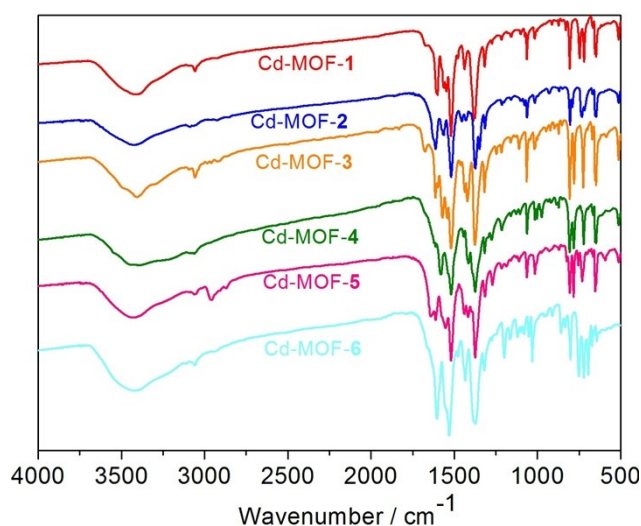

Fig.S1. The FT-IR spectra of the reported six Cd-MOFs in the present paper.

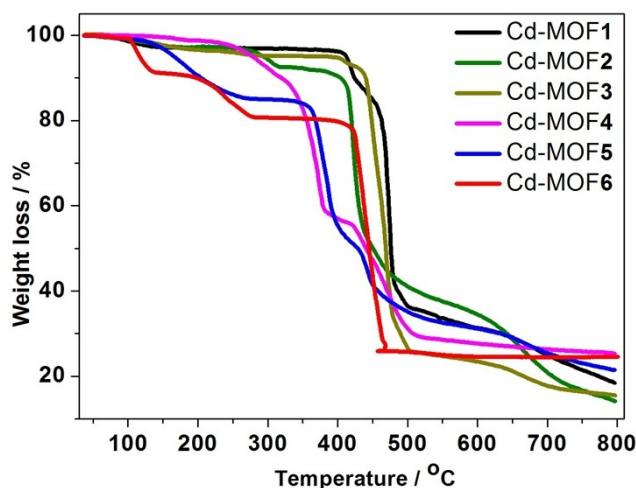

Fig. S2. The TGA curves for the reported six Cd-MOFs in the present paper. Upon heating, the samples started to lose the weight loss from room temperature. The first weight loss ( $\sim 3.6\%$  for Cd-MOF-1 and  $\sim 3.2\%$  for Cd-MOF-2,  $\sim 4.9\%$  for Cd-MOF-3,  $14.9\%$  for Cd-MOF-5 and  $8.9\%$  for Cd-MOF-6) occurred from room temperature, corresponding to the release of the guest water/DMF molecules (calculated loss  $4.3\%$  for Cd-MOF-1 and  $\sim 5.4\%$  for Cd-MOF-2,  $\sim 5.6\%$  for Cd-MOF-3,  $11.6\%$  for Cd-MOF-5 and  $10.2\%$  for Cd-MOF-6) in the structure. The further significant weight losses above about  $380^\circ\text{C}$  for Cd-MOF-1, 3 and 6,  $240^\circ\text{C}$  for Cd-MOF-2 and  $330^\circ\text{C}$  for Cd-MOF-5 were due to the loss/decomposition of the ligands, showing the good thermal stabilities. For Cd-MOF-4, no evident platform on the TG curve was observed, even when the TGA experiment was done at slower heating rate ( $5^\circ\text{C min}^{-1}$ ). In addition, the larger errors between the observed data and calculated data may arise from the moisture during the TGA experiments.

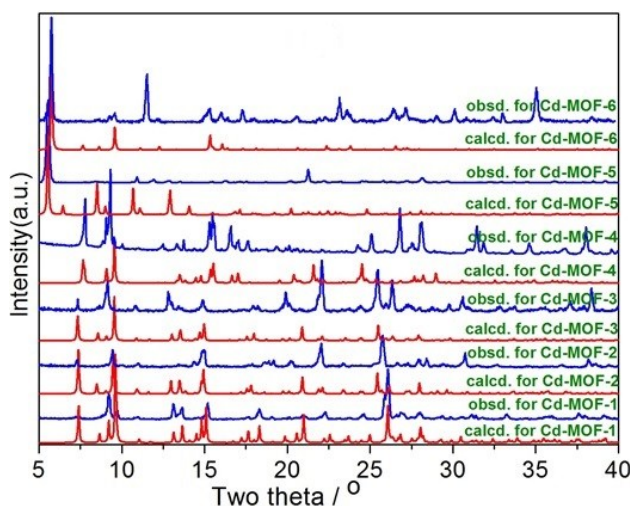

Fig.S3. The comparison of the observed and calculated PXRD patterns from the six Cd-MOFs.

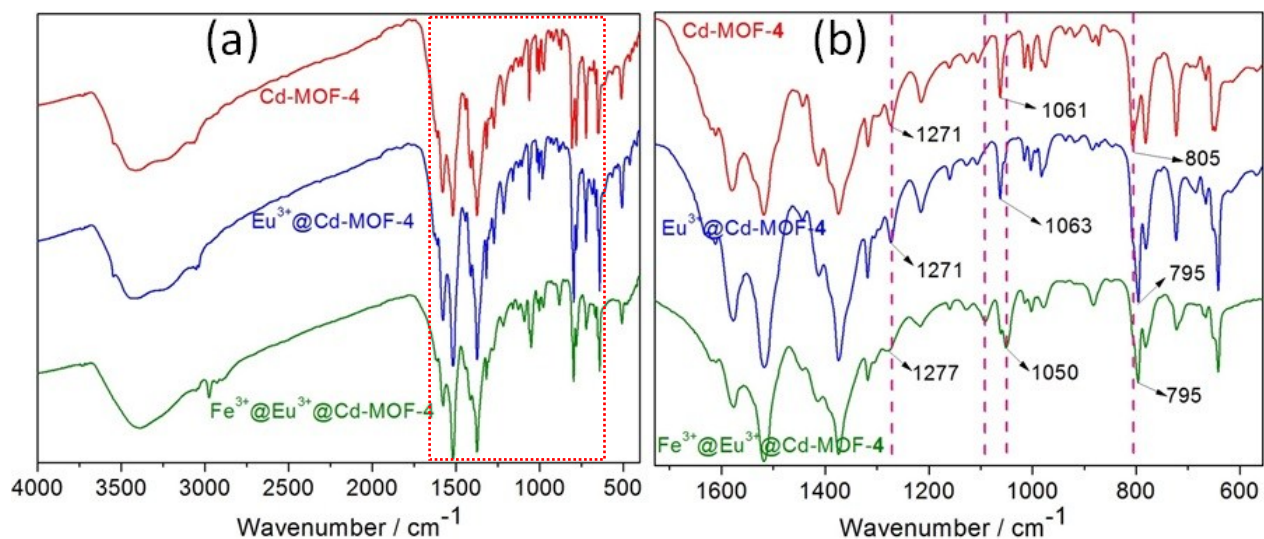

Fig. S4. (a) The FT-IR spectra of the as-synthesized Cd-MOF-4, Eu<sup>3+</sup>@Cd-MOF-4 and Fe<sup>3+</sup>@Eu<sup>3+</sup>@Cd-MOF-4 samples; (b) the enlarged image highlighting the changes before and after the PSMs.

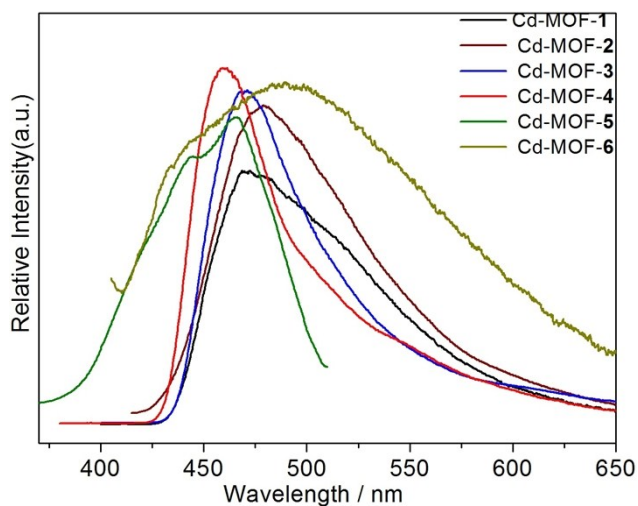

Fig.S5. The luminescence spectra of the reported six Cd-MOFs in the present paper.

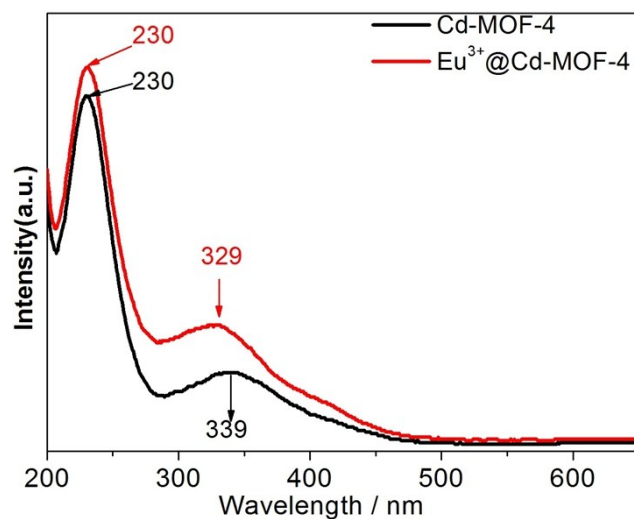

Fig. S6. The UV spectra of the Cd-MOF-4 and Eu<sup>3+</sup>@Cd-MOF-4.

Table S1. Selected bond [Å] and angles [°] for compound **1-6**.

|                                                                                                               |           |             |           |
|---------------------------------------------------------------------------------------------------------------|-----------|-------------|-----------|
| Cd1-O1                                                                                                        | 2.424(2)  | Cd1-O2      | 2.324(2)  |
| Cd1-O3A                                                                                                       | 2.234(2)  | Cd1-O4B     | 2.302(2)  |
| Cd1-N1                                                                                                        | 2.312(3)  | Cd1-N2C     | 2.340(3)  |
| O3A-Cd1-O4B                                                                                                   | 130.29(8) | O3A-Cd1-N1  | 91.27(9)  |
| O4B-Cd1-N1                                                                                                    | 85.07(9)  | O3A-Cd1-O2  | 143.95(9) |
| O4B-Cd1-O2                                                                                                    | 85.67(8)  | N1-Cd1-O2   | 89.31(11) |
| O3A-Cd1-N2C                                                                                                   | 86.82(9)  | O4B-Cd1-N2C | 89.92(9)  |
| N1-Cd1-N2C                                                                                                    | 171.59(9) | O2-Cd1-N2C  | 97.06(11) |
| O3A-Cd1-O1                                                                                                    | 90.23(8)  | O4B-Cd1-O1  | 138.99(8) |
| N1-Cd1-O1                                                                                                     | 102.32(9) | O2-Cd1-O1   | 54.59(8)  |
| N2C-Cd1-O1                                                                                                    | 85.89(9)  |             |           |
| Symmetry code for compound <b>1</b> : A $x-1/2, y-1/2, z$ ; B $-x+1, -y+3, -z+1$ ; C $x+1/2, -y+5/2, z+1/2$ . |           |             |           |
| Cd1-O1                                                                                                        | 2.338(3)  | Cd1-O2      | 2.463(4)  |
| Cd1-O3B                                                                                                       | 2.293(3)  | Cd1-O4A     | 2.261(3)  |

|                                                                                                                  |            |             |            |
|------------------------------------------------------------------------------------------------------------------|------------|-------------|------------|
| Cd1-N1                                                                                                           | 2.301(3)   | Cd1-N2C     | 2.321(3)   |
| O1-Cd1-O2                                                                                                        | 54.39(11)  | O4A-Cd1-N1  | 89.59(11)  |
| O3B-Cd1-N1                                                                                                       | 88.53(12)  | O4A-Cd1-N2C | 85.15(12)  |
| O3B-Cd1-N2C                                                                                                      | 88.21(12)  | N1-Cd1-N2C  | 170.34(12) |
| O4A-Cd1-O1                                                                                                       | 98.38(11)  | O3B-Cd1-O1  | 133.67(12) |
| N1-Cd1-O1                                                                                                        | 101.13(12) | N2C-Cd1-O1  | 87.67(12)  |
| O4A-Cd1-O2                                                                                                       | 151.09(11) | O3B-Cd1-O2  | 81.47(11)  |
| N1-Cd1-O2                                                                                                        | 87.03(13)  | O4A-Cd1-O3B | 127.16(12) |
| N2C-Cd1-O2                                                                                                       | 101.47(14) |             |            |
| Symmetry codes for compound <b>2</b> : A $x-1/2, y+1/2, z$ ; B $-x+1, -y, -z+1$ ; C $x+1/2, -y+1/2, z+1/2$ .     |            |             |            |
| Cd1-O1                                                                                                           | 2.236(3)   | Cd1-O2A     | 2.291(3)   |
| Cd1-N1                                                                                                           | 2.326(3)   | Cd1-N3B     | 2.352(3)   |
| Cd1-O3C                                                                                                          | 2.367(3)   | Cd1-O4C     | 2.399(3)   |
| O1-Cd1-O2A                                                                                                       | 126.96(12) | O1-Cd1-N1   | 90.77(12)  |
| O2A-Cd1-N1                                                                                                       | 87.00(12)  | O1-Cd1-N3B  | 85.84(12)  |
| O2A-Cd1-N3B                                                                                                      | 88.16(12)  | N1-Cd1-N3B  | 170.74(11) |
| O1-Cd1-O3C                                                                                                       | 148.87(12) | O2A-Cd1-O3C | 84.11(11)  |
| N1-Cd1-O3C                                                                                                       | 88.77(13)  | N3B-Cd1-O3C | 98.58(13)  |
| O1-Cd1-O4C                                                                                                       | 95.54(11)  | O2A-Cd1-O4C | 136.74(11) |
| N1-Cd1-O4C                                                                                                       | 101.73(12) | N3B-Cd1-O4C | 87.19(12)  |
| O3C-Cd1-O4C                                                                                                      | 54.26(11)  |             |            |
| Symmetry code for compound <b>3</b> : A $-x+1/2, -y+1/2, -z$ ; B $x-1/2, -y+1/2, z-1/2$ ; C $x-1/2, y+1/2, z$ .  |            |             |            |
| Cd1-O3A                                                                                                          | 2.211(3)   | Cd1-O4B     | 2.228(3)   |
| Cd1-N2C                                                                                                          | 2.327(3)   | Cd1-O2      | 2.326(3)   |
| Cd1-N1                                                                                                           | 2.352(3)   | Cd1-O1      | 2.459(3)   |
| O3A-Cd1-O4B                                                                                                      | 127.94(10) | O3A-Cd1-N2C | 92.62(11)  |
| O4B-Cd1-N2C                                                                                                      | 87.55(11)  | O3A-Cd1-O2  | 85.33(10)  |
| O4B-Cd1-O2                                                                                                       | 143.33(10) | N2C-Cd1-O2  | 108.14(10) |
| O3A-Cd1-N1                                                                                                       | 88.33(11)  | O4B-Cd1-N1  | 85.56(11)  |
| N2C-Cd1-N1                                                                                                       | 171.94(11) | O2-Cd1-N1   | 79.91(10)  |
| O3A-Cd1-O1                                                                                                       | 139.75(10) | O4B-Cd1-O1  | 91.52(10)  |
| N2C-Cd1-O1                                                                                                       | 97.24(10)  | O2-Cd1-O1   | 54.51(10)  |
| N1-Cd1-O1                                                                                                        | 87.13(10)  |             |            |
| Symmetry codes for compound <b>4</b> : A $x-1/2, -y+1/2, z-1/2$ ; B $-x+1/2, y-1/2, -z+1/2$ ; C $x, -y, z-1/2$ . |            |             |            |
| Cd1-N1                                                                                                           | 2.309(3)   | Cd1-N2      | 2.400(3)   |
| Cd1-O1A                                                                                                          | 2.263(3)   | Cd1-O3B     | 2.485(3)   |
| Cd1-O4B                                                                                                          | 2.252(3)   | Cd1-O2      | 2.229(3)   |
| O2-Cd1-O4B                                                                                                       | 144.52(10) | O2-Cd1-O1A  | 126.36(11) |
| O4B-Cd1-O1A                                                                                                      | 87.53(11)  | O2-Cd1-N1   | 91.23(10)  |
| O4B-Cd1-N1                                                                                                       | 97.15(11)  | O1A-Cd1-N1  | 93.85(12)  |

|                                                                                                  |            |             |            |
|--------------------------------------------------------------------------------------------------|------------|-------------|------------|
| O2-Cd1-N2                                                                                        | 84.52(10)  | O4B-Cd1-N2  | 88.52(11)  |
| O1A-Cd1-N2                                                                                       | 85.64(11)  | N1-Cd1-N2   | 174.29(11) |
| O2-Cd1-O3B                                                                                       | 91.98(10)  | O4B-Cd1-O3B | 54.89(10)  |
| O1A-Cd1-O3B                                                                                      | 141.66(10) | N1-Cd1-O3B  | 84.69(13)  |
| N2-Cd1-O3B                                                                                       | 99.23(13)  |             |            |
| Symmetry code for compound <b>5</b> : A $-x+5/3, -y-2/3, -z+4/3$ ; B $y+4/3, -x+y+2/3, -z+5/3$ . |            |             |            |
| Cd1-O1                                                                                           | 2.402(4)   | Cd1-O2      | 2.356(4)   |
| Cd1-O3A                                                                                          | 2.267(4)   | Cd1-O4B     | 2.296(4)   |
| Cd1-N1                                                                                           | 2.325(5)   | Cd1-N2      | 2.302(5)   |
| O3A-Cd1-O4B                                                                                      | 123.09(13) | O3A-Cd1-N2  | 89.19(17)  |
| O4B-Cd1-N2                                                                                       | 94.91(16)  | O3A-Cd1-N1  | 81.91(17)  |
| O4B-Cd1-N1                                                                                       | 86.50(17)  | N2-Cd1-N1   | 170.16(16) |
| O3A-Cd1-O2                                                                                       | 144.53(15) | O4B-Cd1-O2  | 92.37(14)  |
| N2-Cd1-O2                                                                                        | 88.32(16)  | N1-Cd1-O2   | 101.37(16) |
| O3A-Cd1-O1                                                                                       | 90.81(14)  | O4B-Cd1-O1  | 144.67(14) |
| N2-Cd1-O1                                                                                        | 95.22(17)  | N1-Cd1-O1   | 89.14(17)  |
| O2-Cd1-O1                                                                                        | 54.25(14)  |             |            |
| Symmetry code for compound <b>6</b> : A $y+1/3, x-1/3, -z+1/6$ ; B $-y+1/3, -x+2/3, z+1/6$ .     |            |             |            |
